# Supplementary material for: Application of sludge-derived KOH-activated hydrochar in the adsorptive removal of orthophosphate
Source: PubMed Central journal article supplement — RSC Adv. 2021 Feb 5;11(12):6535–43. doi: 10.1039/d0ra10943f (PMC8694899; doi:10.1039/d0ra10943f), 2021-02-05
Supplement: RA-011-D0RA10943F-s001.pdf [file RA-011-D0RA10943F-s001.pdf]

## Supplementary Material

### 1 Supplementary Figures

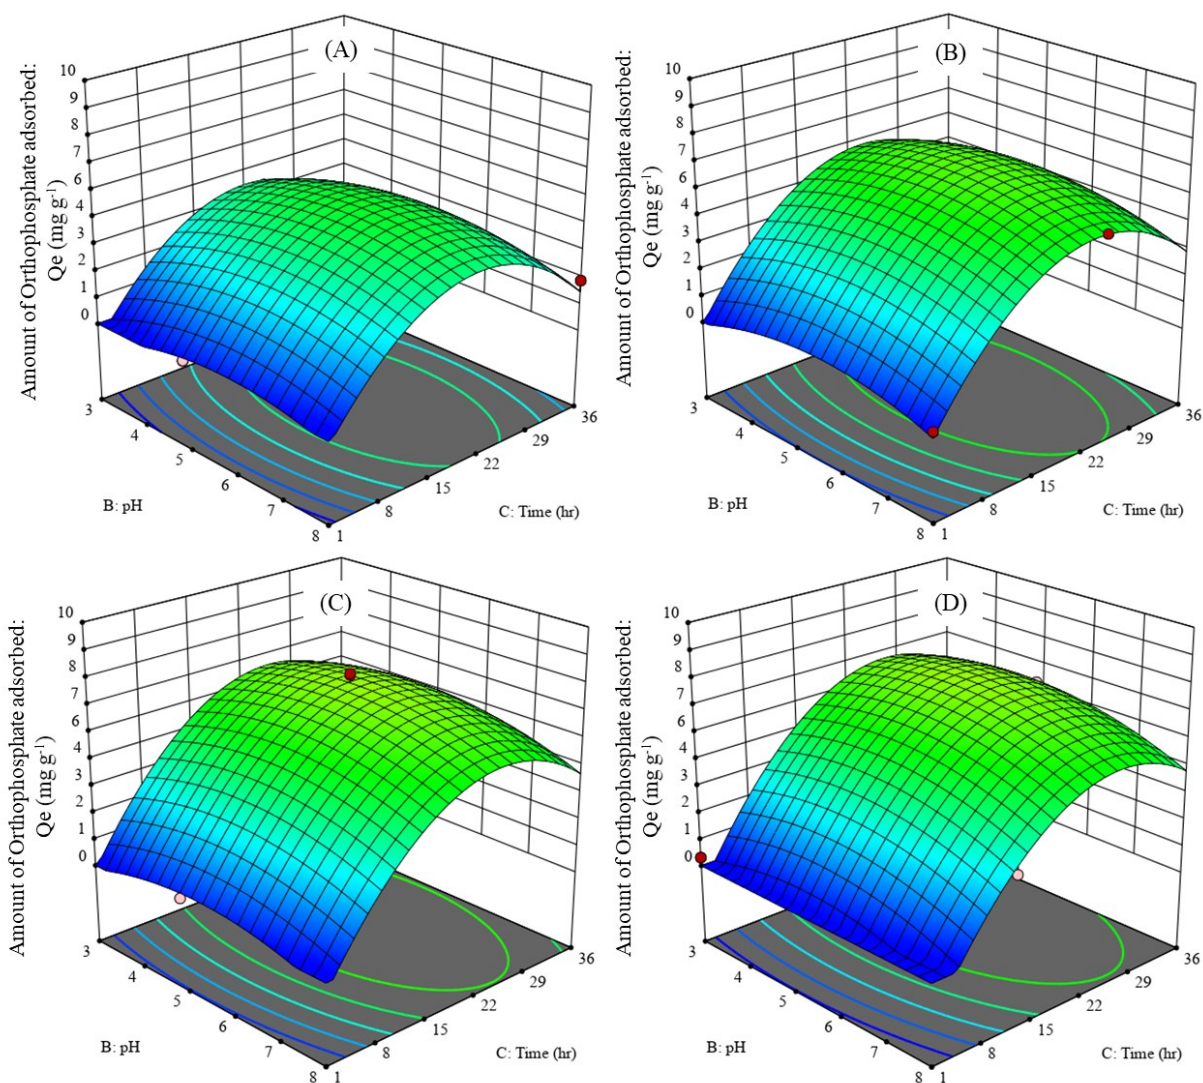

**Supplementary Figure 1.** Three dimensional response surface curve of adsorption parameters on orthophosphate adsorbed by HC at an initial orthophosphate dose of a). 25mg L<sup>-1</sup> b). 50mg L<sup>-1</sup> c). 75mg L<sup>-1</sup> and d). 100mg L<sup>-1</sup>

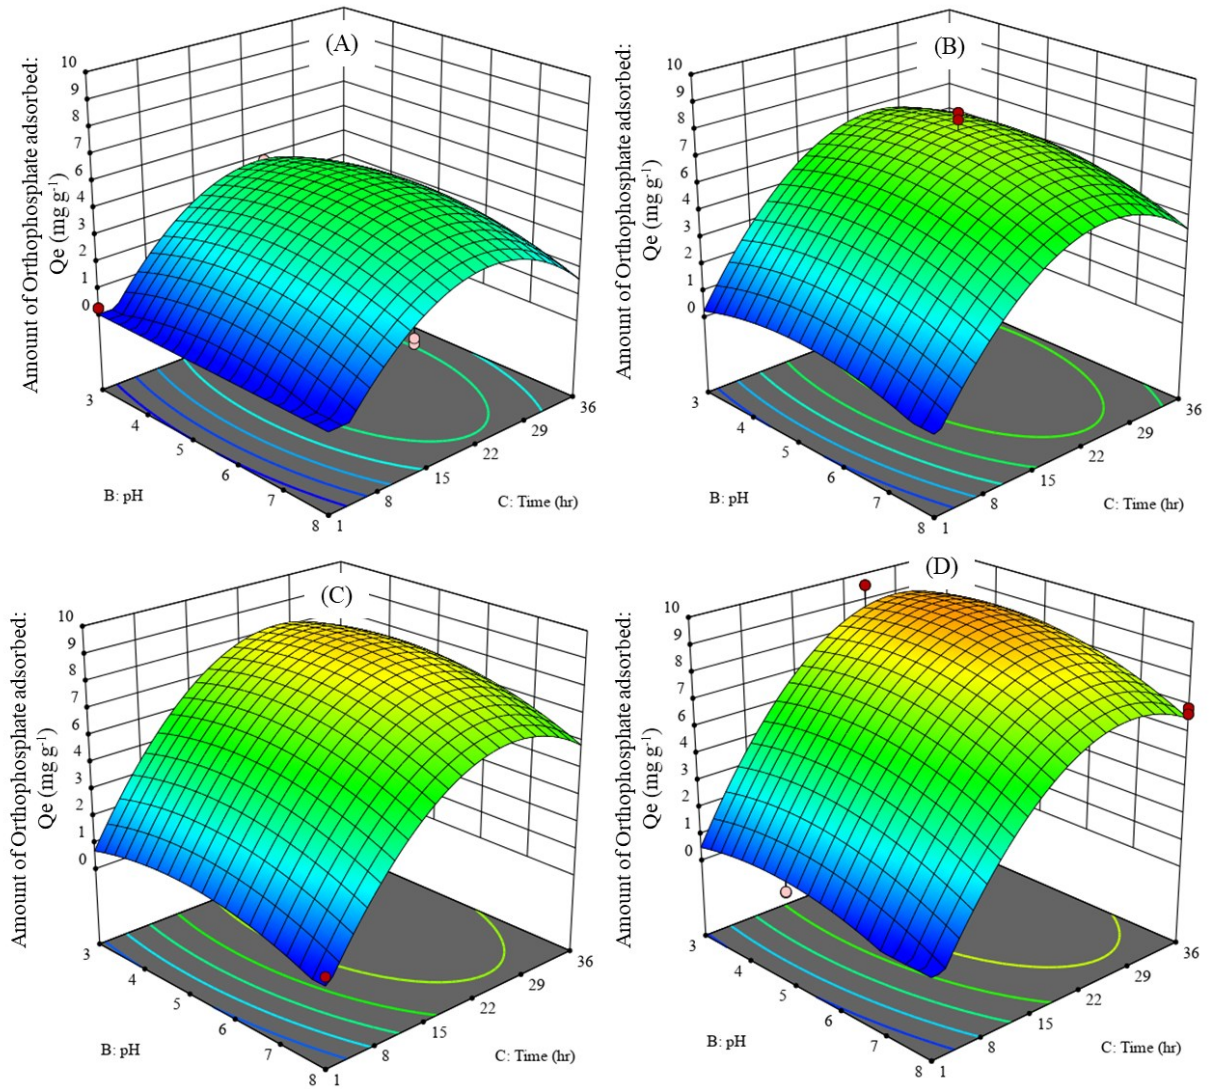

**Supplementary Figure 2.** Three dimensional response surface curve of adsorption parameters on orthophosphate adsorbed by PRHC at an initial orthophosphate dose of a). 25mg L<sup>-1</sup> b). 50mg L<sup>-1</sup> c). 75mg L<sup>-1</sup> and d). 100mg L<sup>-1</sup>

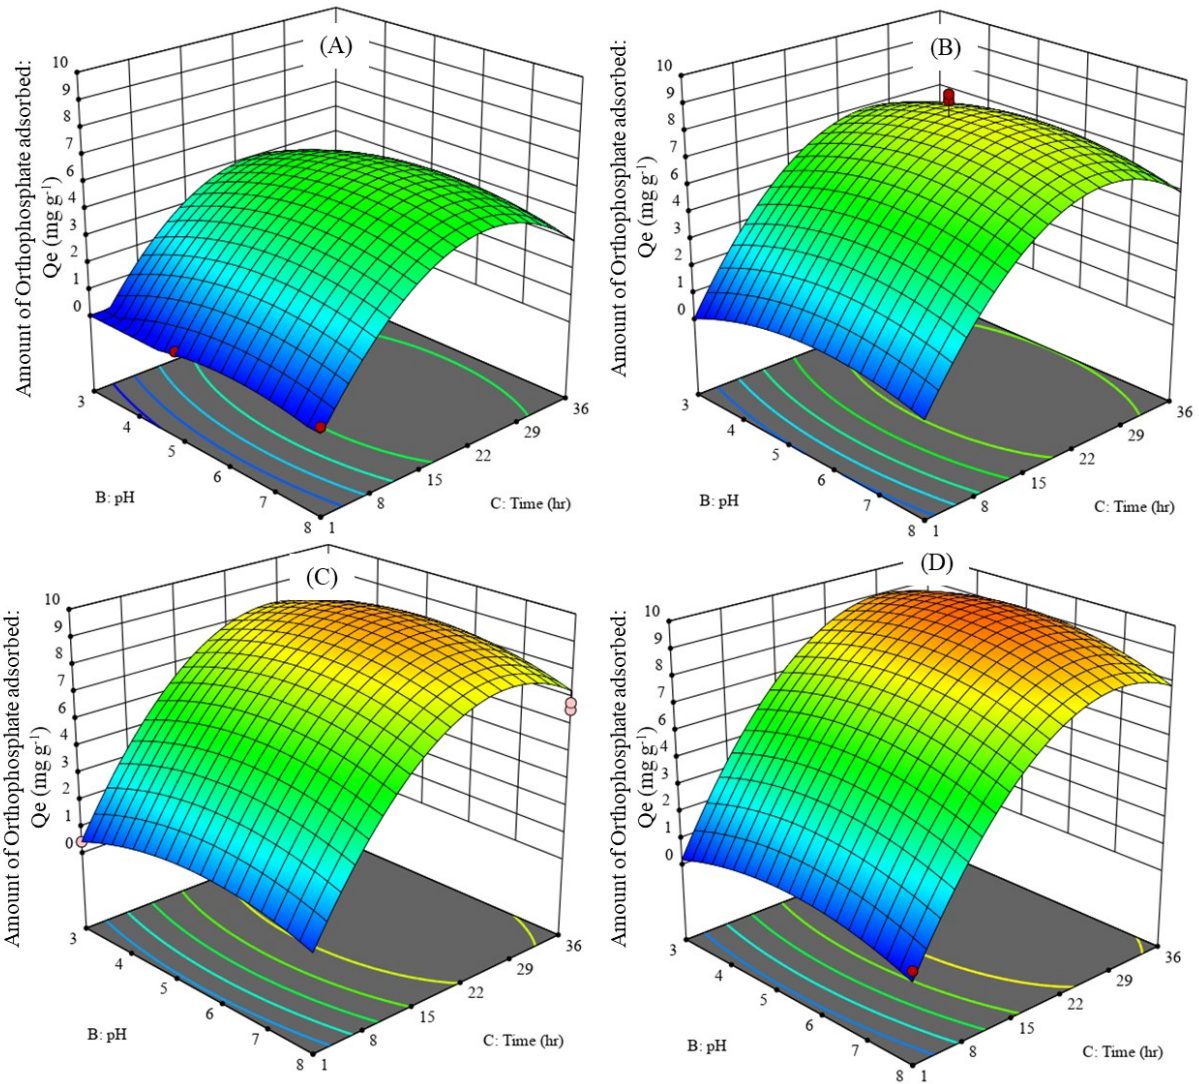

**Supplementary Figure 3.** Three dimensional response surface curve of adsorption parameters on orthophosphate adsorbed by POHC at an initial orthophosphate dose of a). 25mg L<sup>-1</sup> b). 50mg L<sup>-1</sup> c). 75mg L<sup>-1</sup> and d). 100mg L<sup>-1</sup>

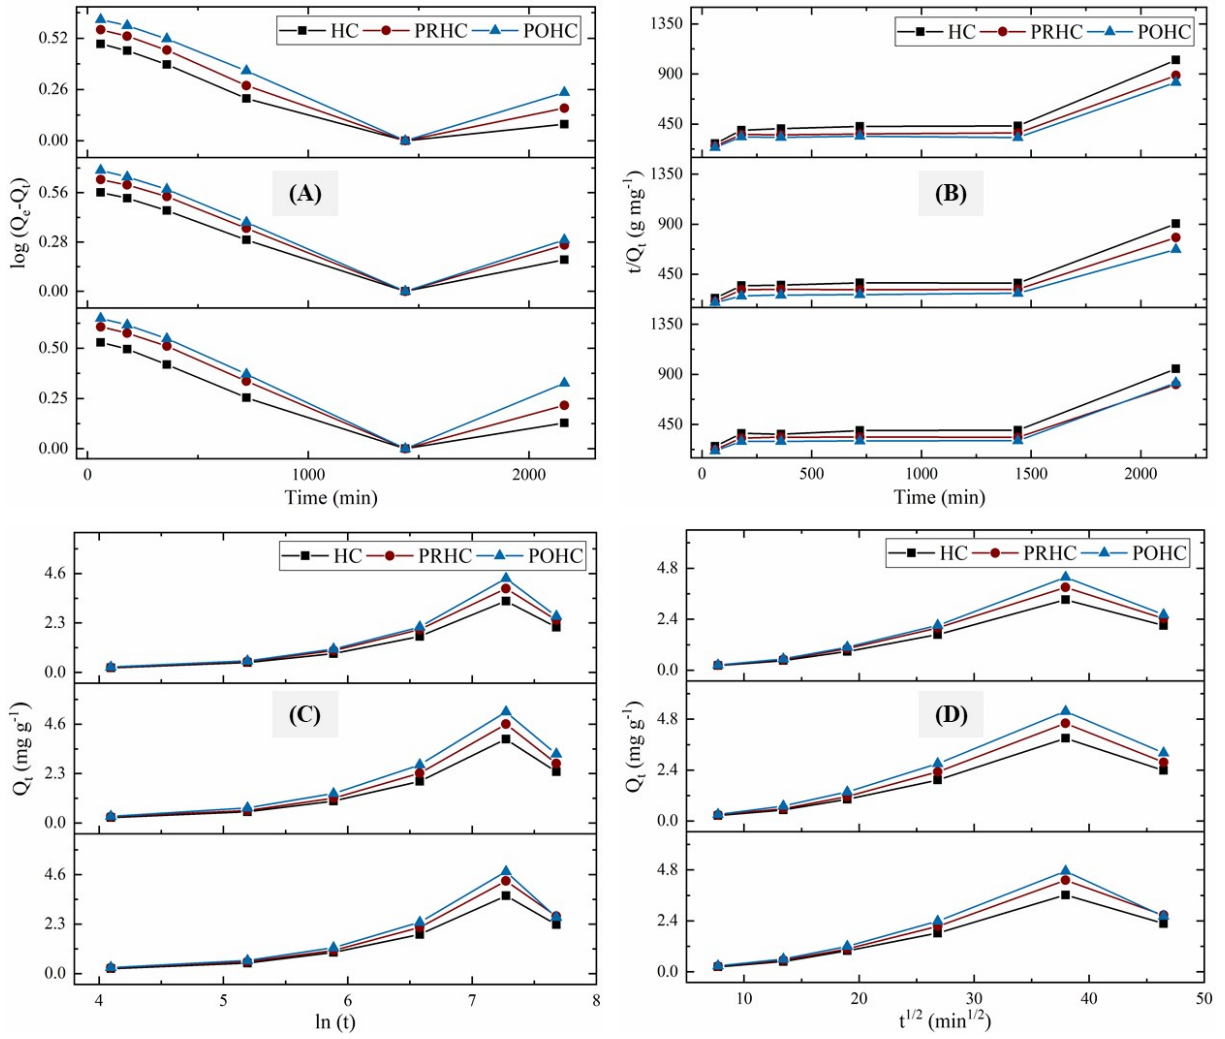

**Supplementary Figure 4.** Kinetic plots of orthophosphate removal a). Pseudo-first order, b). Pseudo-second order, c). Elovich and d). Intraparticle diffusion

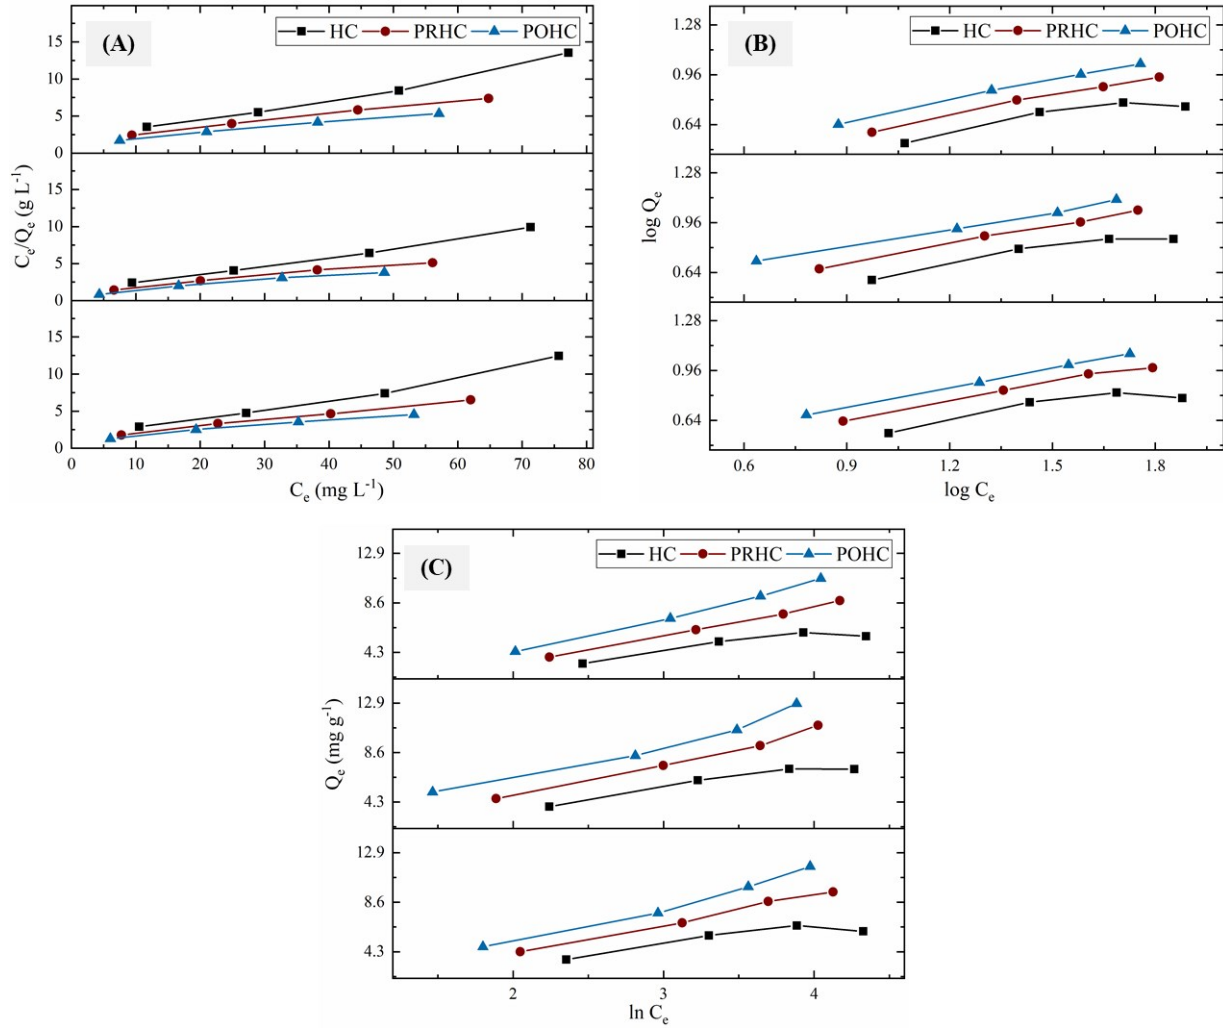

**Supplementary Figure 5.** Isotherm plots of orthophosphate removal a). Langmuir, b). Freundlich and c). Tempkin

## 2 Supplementary Tables

**Supplementary Table 1. Experimental design runs and their analogous results**

| Run | Orthophosphate dose (mg L <sup>-1</sup> ) | pH | Contact time (hr) | Hydrochar type | Amount of Orthophosphate adsorbed : $Q_e$ (mg g <sup>-1</sup> ) |
|-----|-------------------------------------------|----|-------------------|----------------|-----------------------------------------------------------------|
| 1   | 75                                        | 5  | 1                 | HC             | 0.431                                                           |
| 2   | 25                                        | 8  | 36                | HC             | 2.106                                                           |
| 3   | 50                                        | 5  | 24                | POHC           | 8.338                                                           |
| 4   | 75                                        | 5  | 24                | HC             | 7.181                                                           |
| 5   | 50                                        | 5  | 24                | PRHC           | 7.487                                                           |
| 6   | 50                                        | 5  | 24                | PRHC           | 7.781                                                           |

|    |     |   |    |      |        |
|----|-----|---|----|------|--------|
| 7  | 75  | 8 | 36 | POHC | 6.206  |
| 8  | 75  | 8 | 1  | PRHC | 0.356  |
| 9  | 100 | 5 | 36 | HC   | 5.600  |
| 10 | 25  | 8 | 12 | PRHC | 1.994  |
| 11 | 50  | 3 | 36 | HC   | 3.688  |
| 12 | 100 | 3 | 1  | HC   | 0.350  |
| 13 | 75  | 5 | 24 | HC   | 7.263  |
| 14 | 25  | 5 | 1  | HC   | 0.256  |
| 15 | 50  | 3 | 6  | HC   | 1.462  |
| 16 | 75  | 3 | 36 | PRHC | 5.944  |
| 17 | 25  | 3 | 36 | POHC | 2.981  |
| 18 | 75  | 5 | 24 | POHC | 10.575 |
| 19 | 100 | 5 | 36 | HC   | 5.838  |
| 20 | 25  | 8 | 1  | POHC | 0.250  |
| 21 | 100 | 8 | 1  | POHC | 0.425  |
| 22 | 25  | 3 | 1  | PRHC | 0.269  |
| 23 | 25  | 8 | 12 | PRHC | 2.213  |
| 24 | 25  | 3 | 24 | HC   | 3.619  |
| 25 | 100 | 5 | 12 | HC   | 3.775  |
| 26 | 75  | 3 | 6  | PRHC | 2.269  |
| 27 | 25  | 3 | 24 | PRHC | 4.313  |
| 28 | 100 | 8 | 12 | HC   | 2.800  |
| 29 | 25  | 5 | 36 | PRHC | 2.769  |
| 30 | 100 | 8 | 36 | PRHC | 6.350  |
| 31 | 100 | 3 | 36 | POHC | 8.200  |
| 32 | 100 | 5 | 1  | PRHC | 0.450  |
| 33 | 100 | 8 | 36 | PRHC | 6.587  |
| 34 | 25  | 5 | 1  | POHC | 0.306  |
| 35 | 50  | 8 | 24 | HC   | 5.250  |
| 36 | 50  | 5 | 12 | POHC | 4.050  |
| 37 | 50  | 5 | 24 | POHC | 8.584  |
| 38 | 75  | 3 | 1  | POHC | 0.469  |
| 39 | 25  | 5 | 1  | HC   | 0.278  |
| 40 | 100 | 3 | 24 | PRHC | 9.500  |
| 41 | 50  | 8 | 1  | HC   | 0.313  |
| 42 | 25  | 3 | 12 | POHC | 2.388  |
| 43 | 75  | 8 | 36 | POHC | 6.492  |
| 44 | 100 | 5 | 1  | PRHC | 0.482  |
| 45 | 100 | 5 | 6  | POHC | 3.350  |

**Supplementary Table 2. Description of adsorption kinetics and isotherm models**

| Model | Formula | Constants |
|-------|---------|-----------|
|-------|---------|-----------|

| Adsorption Kinetics                        |                                                                                                                                                                                                                                    |                                                                                                                                                                                              |
|--------------------------------------------|------------------------------------------------------------------------------------------------------------------------------------------------------------------------------------------------------------------------------------|----------------------------------------------------------------------------------------------------------------------------------------------------------------------------------------------|
| <b>Pseudo-first order<sup>1</sup></b>      | $\log(q_e - qt) = \log q_e - \frac{k_1}{2.303}t$                                                                                                                                                                                   | $k_1$ - Equilibrium rate constant of pseudo first order adsorption ( $\text{min}^{-1}$ )                                                                                                     |
| <b>Pseudo-second order<sup>2</sup></b>     | $\frac{t}{q_1} = \frac{1}{k_2 q_e^2} + \frac{t}{q_e}$                                                                                                                                                                              | $k_2$ - Adsorption rate constant ( $\text{g mg}^{-1} \text{min}^{-1}$ )                                                                                                                      |
| <b>Elovich<sup>3</sup></b>                 | $q_t = q_0 + \frac{1}{\beta} \ln(\alpha\beta) + \frac{1}{\beta} \ln \frac{1}{1 - \exp(-\beta q_t)}$                                                                                                                                | $\alpha$ - Initial rate constant ( $\text{mg g}^{-1} \text{min}^{-1}$ )<br>$\beta$ - Constant related to the surface coverage and activation energy for chemisorption ( $\text{g mg}^{-1}$ ) |
| <b>Intraparticle diffusion<sup>4</sup></b> | $q_t = k_t t^{1/2} + C$                                                                                                                                                                                                            | $K_i$ - Intraparticle diffusion rate constant ( $\text{mg g}^{-1} \text{min}^{-1/2}$ )<br>$C$ - Constant associated with the thickness of the boundary layer ( $\text{mg g}^{-1}$ )          |
| Adsorption Isotherms                       |                                                                                                                                                                                                                                    |                                                                                                                                                                                              |
| <b>Langmuir<sup>5</sup></b>                | $\frac{c_e}{q_e} = \frac{1}{K_L X_m} + \frac{c_e}{X_m}$                                                                                                                                                                            | $K_L$ - Langmuir constant ( $\text{L mol}^{-1}$ )<br>$X_m$ - Maximum adsorption capacity ( $\text{mg g}^{-1}$ )                                                                              |
| <b>Freundlich<sup>6</sup></b>              | $\log q_e = \log k_f + \frac{1}{n} \log c_e$                                                                                                                                                                                       | $K_f$ - Constant related with the adsorption capacity of the sorbent<br>$n$ - Intensity of sorption                                                                                          |
| <b>Temkin<sup>7</sup></b>                  | $q_e = \frac{RT}{B} \ln K_T + \frac{RT}{B} \ln c_e$                                                                                                                                                                                | $B$ - Temkin constant ( $\text{J mol}^{-1}$ )<br>$K_T$ - Temkin isotherm energy constant ( $\text{L g}^{-1}$ )                                                                               |
|                                            | $q_e$ - Adsorption capacity adsorbed at equilibrium ( $\text{mg g}^{-1}$ )<br>$q_t$ - Adsorption capacity adsorbed at time $t$ ( $\text{mg g}^{-1}$ )<br>$c_e$ - Equilibrium concentration of the adsorbate ( $\text{mg L}^{-1}$ ) |                                                                                                                                                                                              |

**Supplementary Table 3. Derived equations for kinetics and isotherms studies**

| Adsorption Kinetics |                         |                       |                       |                       |
|---------------------|-------------------------|-----------------------|-----------------------|-----------------------|
|                     | Models                  | pH 3                  | pH 5                  | pH 8                  |
| <b>HC</b>           | Pseudo-first order      | $y = -0.0002x + 0.48$ | $y = -0.0002x + 0.52$ | $y = -0.0002x + 0.45$ |
|                     | Pseudo-second order     | $y = 0.261x + 240.2$  | $y = 0.2486x + 225.7$ | $y = 0.2808x + 263.9$ |
|                     | Elovich                 | $y = 0.8253x - 3.475$ | $y = 0.8786x - 3.703$ | $y = 0.7603x - 3.207$ |
|                     | Intraparticle diffusion | $y = 0.0738x - 0.28$  | $y = 0.0785x - 0.31$  | $y = 0.0681x - 0.27$  |
| <b>PRHC</b>         | Pseudo-first order      | $y = -0.0002x + 0.56$ | $y = -0.0002x + 0.59$ | $y = -0.0002x + 0.52$ |

|                             |                         |                       |                       |                       |
|-----------------------------|-------------------------|-----------------------|-----------------------|-----------------------|
|                             | Pseudo-second order     | $y = 0.2139x + 218.7$ | $y = 0.2098x + 199.7$ | $y = 0.2355x + 236.5$ |
|                             | Elovich                 | $y = 0.9838x - 4.18$  | $y = 1.0363x - 4.38$  | $y = 0.8958x - 3.79$  |
|                             | Intraparticle diffusion | $y = 0.0882x - 0.38$  | $y = 0.0926x - 0.38$  | $y = 0.08x - 0.337$   |
| <b>POHC</b>                 | Pseudo-first order      | $y = -0.0002x + 0.59$ | $y = -0.0003x + 0.63$ | $y = -0.0002x + 0.57$ |
|                             | Pseudo-second order     | $y = 0.2284x + 185.8$ | $y = 0.1817x + 173$   | $y = 0.2143x + 224.3$ |
|                             | Elovich                 | $y = 1.0303x - 4.329$ | $y = 1.1841x - 4.999$ | $y = 0.9867x - 4.205$ |
|                             | Intraparticle diffusion | $y = 0.091x - 0.322$  | $y = 0.1054x - 0.41$  | $y = 0.0883x - 0.39$  |
| <b>Adsorption Isotherms</b> |                         |                       |                       |                       |
| <b>HC</b>                   | Langmuir                | $y = 0.1461x + 0.960$ | $y = 0.1215x + 1.092$ | $y = 0.1525x + 1.319$ |
|                             | Freundlich              | $y = 0.2844x + 0.301$ | $y = 0.314x + 0.311$  | $y = 0.307x + 0.224$  |
|                             | Temkin                  | $y = 1.3782x + 0.719$ | $y = 1.7006x + 0.345$ | $y = 1.3756x + 0.226$ |
| <b>PRHC</b>                 | Langmuir                | $y = 0.0857x + 1.230$ | $y = 0.0746x + 1.087$ | $y = 0.0897x + 1.672$ |
|                             | Freundlich              | $y = 0.3909x + 0.294$ | $y = 0.4007x + 0.339$ | $y = 0.4206x + 0.191$ |
|                             | Temkin                  | $y = 2.5516x - 0.962$ | $y = 2.8823x - 0.979$ | $y = 2.5003x - 1.738$ |
| <b>POHC</b>                 | Langmuir                | $y = 0.0683x + 1.030$ | $y = 0.0662x + 0.735$ | $y = 0.0725x + 1.281$ |
|                             | Freundlich              | $y = 0.4174x + 0.34$  | $y = 0.3695x + 0.474$ | $y = 0.443x + 0.260$  |
|                             | Temkin                  | $y = 3.1553x - 1.192$ | $y = 3.0347x + 0.395$ | $y = 3.0938x - 1.975$ |

## References

- 1 Lagergren S, *Handl. Band*, 1898, **24**, 1.
- 2 Y. S. Ho, J. F. Porter and G. McKay, *Water. Air. Soil Pollut.*, 2002, 141, 1–33.
- 3 C. Namasivayam and D. Kavitha, *Dye. Pigment.*, 2002, **54**, 47–58.
- 4 H. Moon and W. Kook Lee, *J. Colloid Interface Sci.*, 1983, **96**, 162–171.
- 5 K. Y. Foo and B. H. Hameed, *Chem. Eng. J.*, 2010, 156, 2–10.
- 6 A. Deb, M. Kanmani, A. Debnath, K. L. Bhowmik and B. Saha, *Ultrason. Sonochem.*, 2019, **54**, 290–301.
- 7 S. J. Allen, G. McKay and K. Y. H. Khader, *Environ. Pollut.*, 1989, **56**, 39–50.
